# Supplementary material for: PET and FRET utility of an amino acid pair: tryptophan and 4-cyanotryptophan
Source: Royal Society of Chemistry journal article supplement (doi:10.1039/c9cp02126d), 2019-01-01
Supplement: c9cp02126d1.pdf [file c9cp02126d1.pdf]

## Electronic Supplementary Information

### PET and FRET Utility of an Amino Acid Pair: Tryptophan and 4-Cyanotryptophan

Ismail A. Ahmed<sup>1</sup>, Jeffrey M. Rodgers<sup>2</sup>, Christina Eng<sup>3</sup>, Thomas Troxler<sup>1,2</sup>, and Feng Gai<sup>2,\*</sup>

<sup>1</sup>Department of Biochemistry and Biophysics, <sup>2</sup>Department of Chemistry, and <sup>3</sup>Department of Chemical and Biomolecular Engineering, University of Pennsylvania, Philadelphia, Pennsylvania 19104, United States

\*Correspondence: [gai@sas.upenn.edu](mailto:gai@sas.upenn.edu); +1-215-573-6256 (F.G.)

## Experimental Methods

### Förster Distance Calculation

The Förster distance ( $R_0$ ) of the Trp (donor) and 4CN-Trp<sup>1</sup> (acceptor) FRET pair was calculated using the following equation:<sup>2</sup>

$$R_0^6 = \left( \frac{9000(\ln 10)\kappa^2 Q_D}{128\pi^5 N \eta^4} \right) J(\lambda), \quad (\text{S1})$$

where  $\kappa^2$  is the orientation factor, assumed to be 2/3,  $Q_D$  is the fluorescence quantum yield of the donor in the absence of the acceptor which is 0.14 for Trp in water,<sup>3,4</sup>  $N$  is the Avogadro's number,  $\eta$  is the refractive index of the medium (1.33 for water), and  $J(\lambda)$  is the overlap integral, determined by the following equation:<sup>2</sup>

$$J(\lambda) = \int_0^\infty F_D(\lambda) \varepsilon_A(\lambda) \lambda^4 d\lambda, \quad (\text{S2})$$

where  $F_D(\lambda)$  is the area-normalized emission spectrum of the donor and  $\varepsilon_A(\lambda)$  is the wavelength-dependent molar absorption coefficient of the acceptor.

### Stern-Volmer Titration and Numerical Fitting

Static fluorescence quenching experiments ( $\lambda_{\text{ex}} = 330$  nm) was carried out using free 4CNI-3AA and NATA. To determine the underlying quenching rate<sup>5</sup>, we employed a diffusion model as described in detail elsewhere<sup>6,7</sup> to numerically fit the experimental Stern-Volmer curve (Figure 4 in the main text). Briefly, the decaying fluorescence signal  $I(t)$  is described by:

$$I(t) = I_0 \exp\left(-\frac{t}{\tau_0} - C_Q^0 \int_0^t k(t') dt'\right), \quad (\text{S3})$$

where  $\tau_0$  is the fluorescence lifetime of the fluorophore,  $C_Q^0$  is the quencher bulk concentration, and  $k(t)$  is the time-dependent quenching rate which is calculated using:

$$k(t) = \frac{4\pi}{C_Q^0} \int_{a_0}^\infty r^2 k_Q(r) C_Q(r,t) dr, \quad (\text{S4})$$

In the above equation,  $C_Q(r,t)$  is the concentration of quencher at distance  $r$  from the fluorophore at time  $t$ , and  $k_Q(r)$  is the distance-dependent quenching rate, defined as:<sup>2</sup>

$$k_Q(r) = k_0 e^{-\beta(r - a_0)}, \quad (\text{S5})$$

where  $k_0$  is the quenching rate when the pair are in van der Waals contact (when  $r = a_0$ ), and  $\beta$  is a constant. For this study, the value of  $a_0$  was set to 7.0 Å, which corresponds to the sum of the

van der Waals radii of two tryptophan sidechains. By defining a normalized concentration of the quencher as:

$$y(r,t) = C_Q(r,t)/C_Q^0, \quad (\text{S6})$$

we can model the time- and distance-dependent quenching using the following equation:

$$\frac{\partial}{\partial t}y(r,t) = -D\nabla^2y(r,t) - k_Q(r)y(r,t), \quad (\text{S7})$$

We numerically solved for  $C_Q(r,t)$  using the following initial conditions and boundary conditions:

$$y(r,t = 0) = 1, \quad (\text{S8})$$

$$\left(\frac{\partial}{\partial t}y(r,t)\right)_{r=a_0} = 0, \quad (\text{S9})$$

$$\lim_{r \rightarrow \infty} y(r,t) = 1, \quad (\text{S10})$$

and subsequently obtained  $k(t)$  and  $I(t)$  for each bulk quencher concentration  $C_Q^0$ . For the Stern-Volmer data presented in Figure 4, the best fit yielded the following parameters:  $k_0 = 6.8 \text{ ns}^{-1}$ ,  $\beta = 1.3 \text{ \AA}^{-1}$ , and  $a_0 = 7.0 \text{ \AA}$ .

### *Molecular Dynamics Simulations*

Molecular dynamics (MD) simulations on the 4CN-Trp-Trp peptide were carried out to characterize its conformational distribution in aqueous solution. First, the force field parameters for the 4-cyanoindole moiety were determined using the Force Field Toolkit Plugin<sup>8</sup> v1.1 for VMD<sup>9</sup> v1.9.4 with the initial charge, bond, and angle parameters from CHARMM36<sup>10</sup> and CGenFF v4.1 for Small Molecule Drug Design.<sup>11</sup> The peptide model was built using Vega ZZ<sup>12</sup> v3.1.1 with an initial structure of a fully extended conformation ( $\phi = \psi = 180^\circ$ ) and then solvated using the Automatic PSF Generation Plugin v.1.3 in VMD. Simulations were carried out using the NAMD<sup>13</sup> v.2.12 software package. Following a 1 ns equilibration run at 298 K and 1 atm in the NPT ensemble, subsequent production runs totaling 150 ns were performed on the equilibrated system at 298 K in the NVT ensemble. A trajectory was built by saving a snapshot every 500 fs, resulting in 300,000 total frames. Analysis of the MD trajectory was accomplished using VMD; for each frame, the minimum distance between any atoms in the 4-cyanoindole ring and the indole ring in the peptide was determined and used for constructing the distance distribution plot.

**Table S1.** Fluorescence lifetime ( $\tau$ ) and relative amplitude (A) determined from fitting the fluorescence decay of each peptide in Figure S1 to a single or bi-exponential function. The data for 4CN-Trp-Met were taken from Ref. 1.

| Peptide Name | Peptide Sequence | $\tau$ (ns) | A (%) |
|--------------|------------------|-------------|-------|
| 4CN-Trp-Gly  | 4CN-Trp-G        | 12.8        | 100   |
| 4CN-Trp-His  | 4CN-Trp-H        | 12.5        | 100   |
| 4CN-Trp-Arg  | 4CN-Trp-R        | 12.5        | 100   |
| 4CN-Trp-Ser  | 4CN-Trp-S        | 12.6        | 100   |
| 4CN-Trp-Glu  | 4CN-Trp-E        | 12.6        | 100   |
| 4CN-Trp-Met  | 4CN-Trp-M        | 12.2        | 100   |
| 4CN-Trp-Phe  | 4CN-Trp-FAAKKK   | 11.5        | 100   |
| 4CN-Trp-Tyr  | 4CN-Trp-YAAKKK   | 10.5        | 100   |
| 4CN-Trp-Trp  | 4CN-Trp-WAAKKK   | 4.1         | 64    |
|              |                  | 0.3         | 36    |

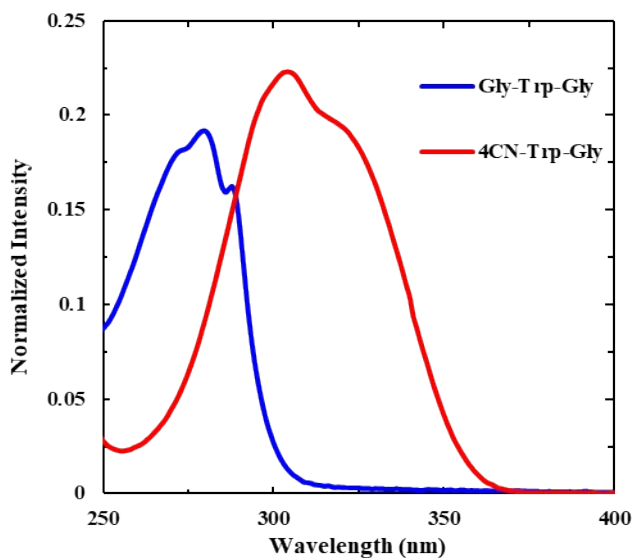

**Figure S1.** Absorption spectra of Gly-Trp-Gly (33  $\mu$ M) and 4CN-Trp-Gly (33  $\mu$ M) in water, as indicated.

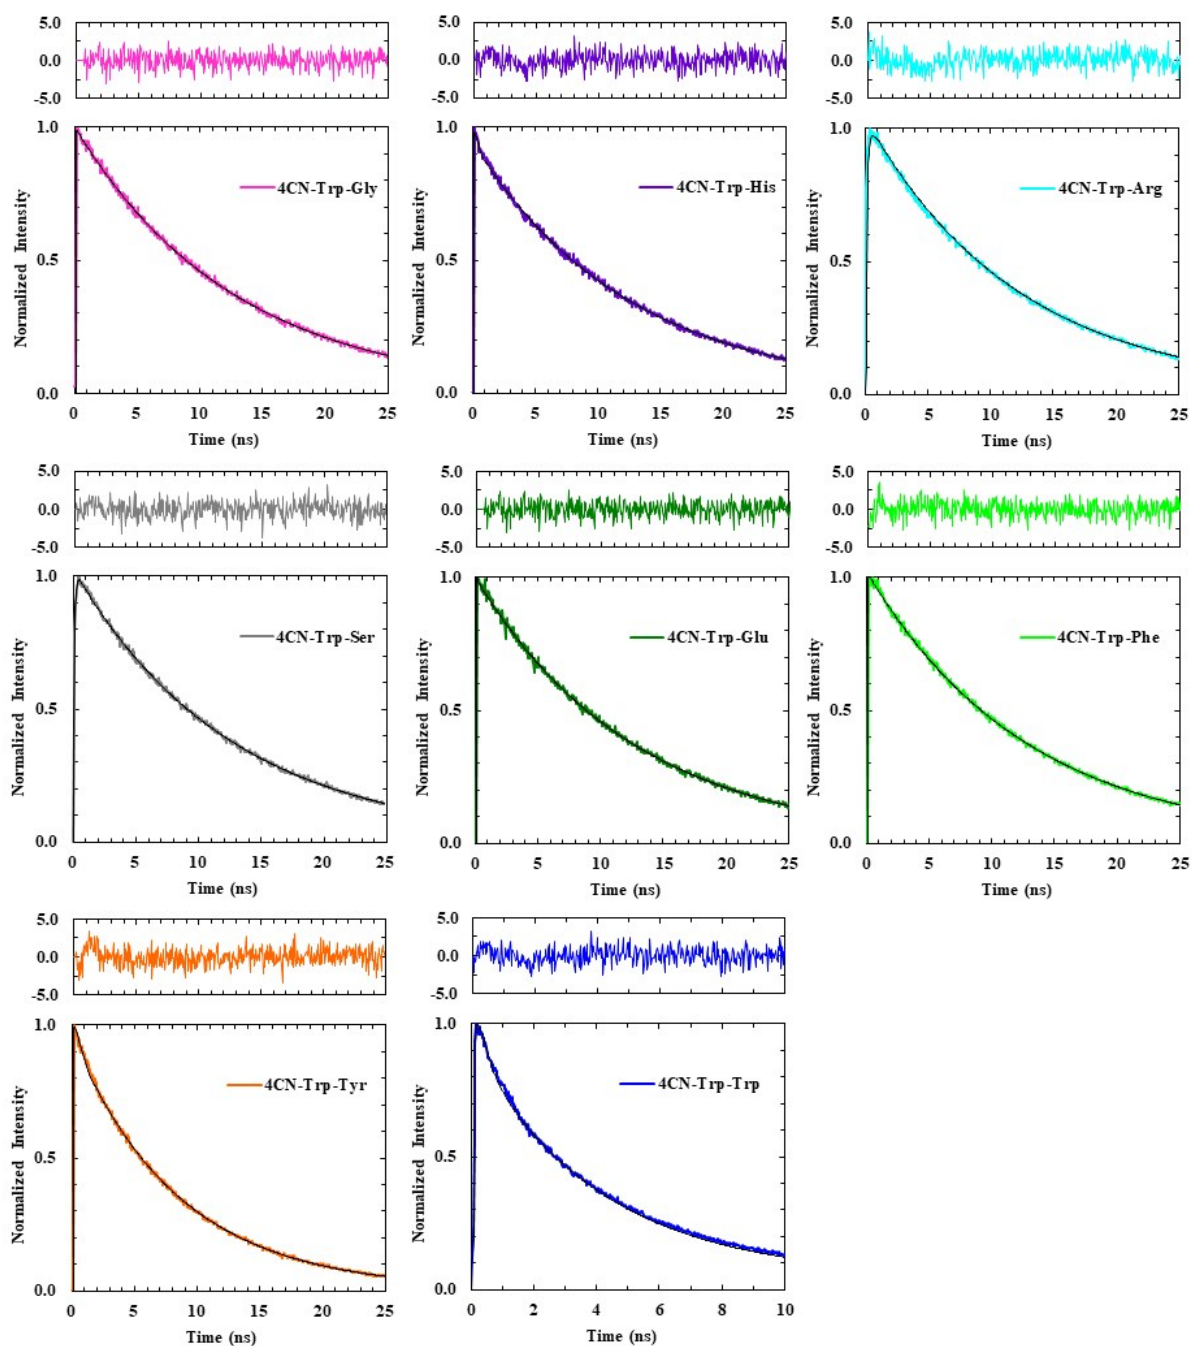

**Figure S2.** Fluorescence decay kinetics of 4CN-Trp-X peptides, as indicated. In each case, the smooth black line corresponds to the best fit of the respective data to a single-exponential or a bi-exponential function and the resultant lifetime(s) is given in Table S1. Residuals of the fits are on top of each respective panel.

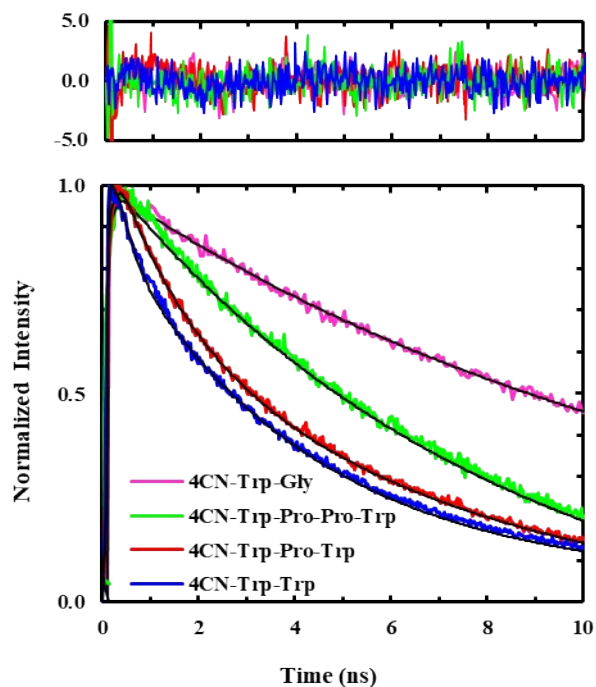

**Figure S3.** Fluorescence decay kinetics of 4CN-Trp-Gly, 4CN-Trp-Pro-Pro-Trp, 4CN-Trp-Pro-Trp, and 4CN-Trp-Trp, as indicated. The smooth line in each case correspond to the best fit of the data to either a single-exponential function (4CN-Trp-Gly and 4CN-Trp-Pro-Pro-Trp) or a bi-exponential function (4CN-Trp-Pro-Trp and 4CN-Trp-Trp) and the resultant lifetime(s) are listed in Table 1 of the main text.

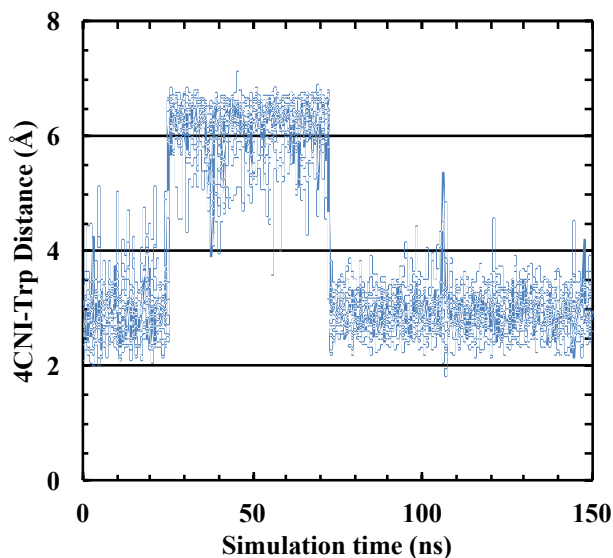

**Figure S4.** The trajectory of the separation distance between the two fluorophores in the 4CN-Trp-Trp peptide obtained from the MD simulations.

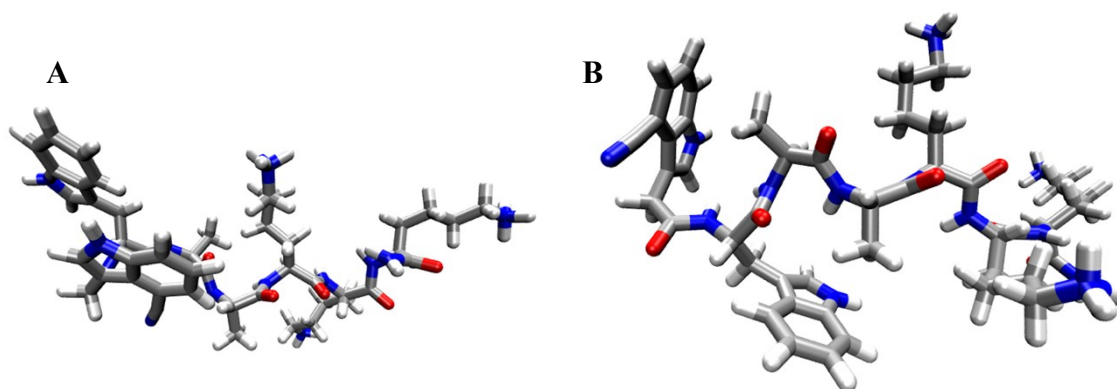

**Figure S5.** Representative structures of the two conformational populations of the 4CN-Trp-Trp peptide. The distances between the 4-cyanoindole and indole moieties are 2.96 Å (A) and 6.62 Å (B), respectively.

#### References

1. M. R. Hilaire, I. A. Ahmed, C. W. Lin, H. Jo, W. F. DeGrado and F. Gai, *Proc. Natl. Acad. Sci. U.S.A.*, 2017, **114**, 6005-6009.
2. J. R. Lakowicz, *Principles of Fluorescence Spectroscopy*. Springer: New York, USA, 2nd edn. 1999.
3. R. N. Chen, *Anal. Lett.*, 1967, **1**, 35-42.
4. K. Suzuki, A. Kobayashi, S. Kaneko, K. Takehira, T. Yoshihara, H. Ishida, Y. Shiina, S. Oishi and S. Tobita, *Phys. Chem. Chem. Phys.*, 2009, **11**, 9850-60.
5. B. N. Markiewicz, D. Mukherjee, T. Troxler and F. Gai, *J. Phys. Chem. B*, 2016, **120**, 936-944.
6. J. R. Lakowicz, B. Zelent, I. Gryczynski, J. Kusba and M. L. Johnson, *Photochem. Photobiol.*, 1994, **60**, 205-214.
7. M. R. Mintzer, T. Troxler and F. Gai, *Phys. Chem. Chem. Phys.*, 2015, **17**, 7881-7887.
8. C. G. Mayne, J. Saam, K. Schulten, E. Tajkhorshid and J. C. Gumbart, *J. Comput. Chem.* 2013, **34**, 2757-2770.
9. W. Humphrey, A. Dalke and K. Schulten, *J. Mol. Graph.*, 1996, **14**, 33-38.
10. R. B. Best, X. Zhu, J. Shim, P. E. M. Lopes, J. Mittal, M. Feig and A. D. MacKerell, *J. Chem. Theory Comput.*, 2012, **8**, 3257-3273.
11. K. Vanommeslaeghe, E. Hatcher, S. K. Acharya, S. Zhong, J. Shim, E. Darian, O. Guvench, P. Lopes, I. Vorobyov and A. D. J. Mackarell, *J. Comput. Chem.*, 2010, **31**, 671-690.
12. A. Pedretti, L. Villa and G. Vistoli, *J. Mol. Graph. Model.*, 2002, **21**, 47-49.
13. J. C. Phillips, R. Braun, W. Wang, J. Gumbart, E. Tajkhorshid, E. Villa, C. Chipot, R. D. Skeel, L. Kalé and K. Schulten, *J. Comput. Chem.*, 2005, **26**, 1781-1802.
